# Supplementary material
Source: PubMed Central journal article supplement (PMC2758760)
Supplement: M900140-MCP200_1.pdf [file M900140-MCP200_1.pdf]

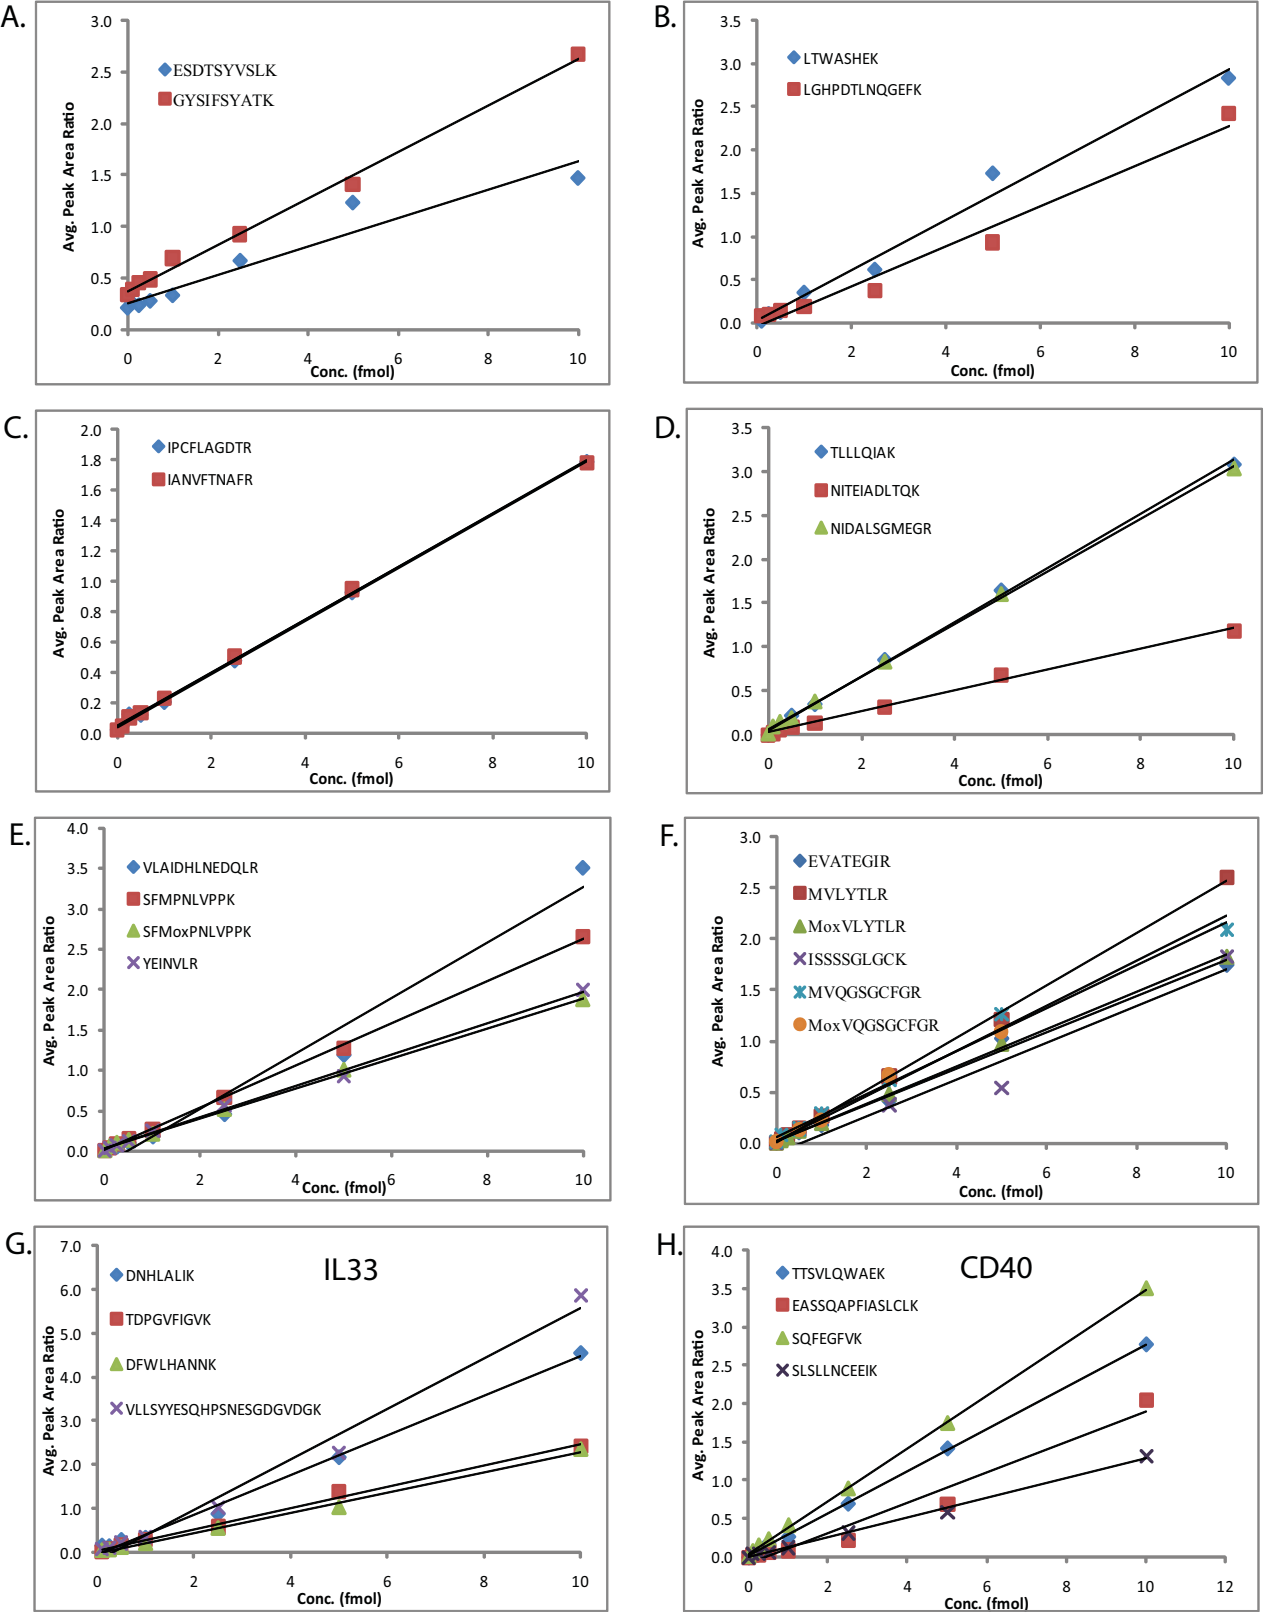

**Supplemental Figure 1: Calibration curve of all the peptides in SCX background.** Linear regression analysis of the standard addition data for the peptides of CRP (A), MRP-14 (B), MPO (C), cTnI (D), cTnT (E), NTproBNP and BNP32 (F), IL-33 (G), and sCD40L (H).

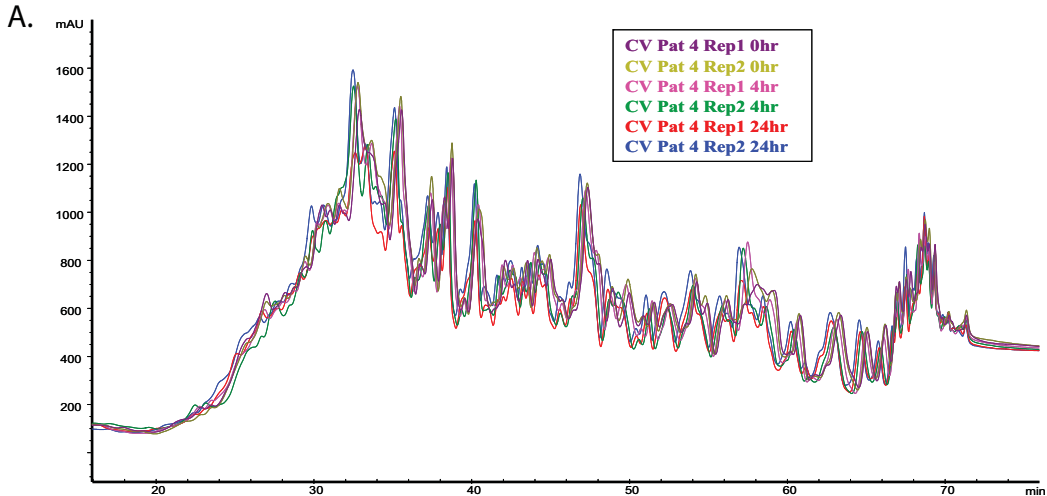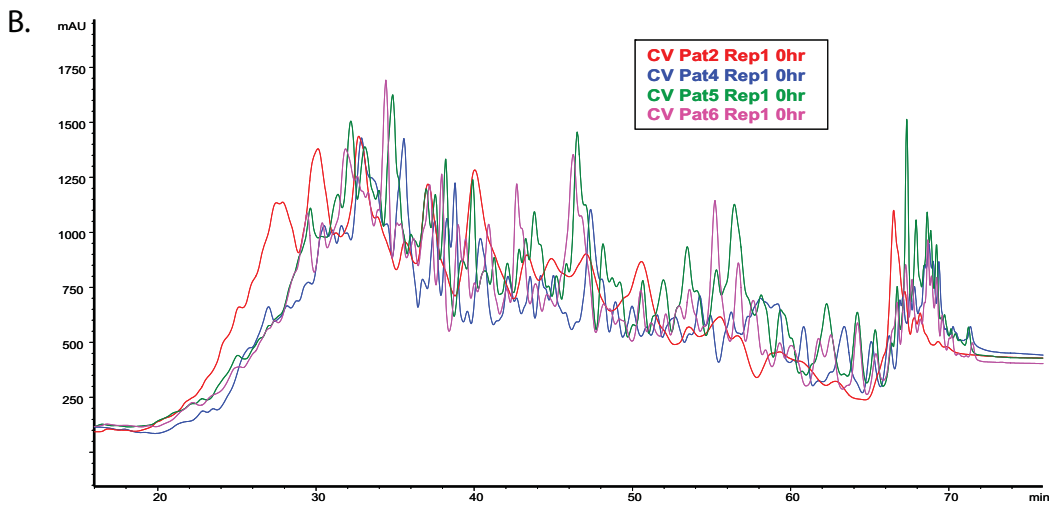

**Supplemental Figure 2: SCX profile of patient plasma digest.** Overlaid SCX chromatograms for two process replicates at baseline, 4 hours and 24 hours for one patient (**A**) and one replicate of the baseline sample for 4 different patients (**B**).

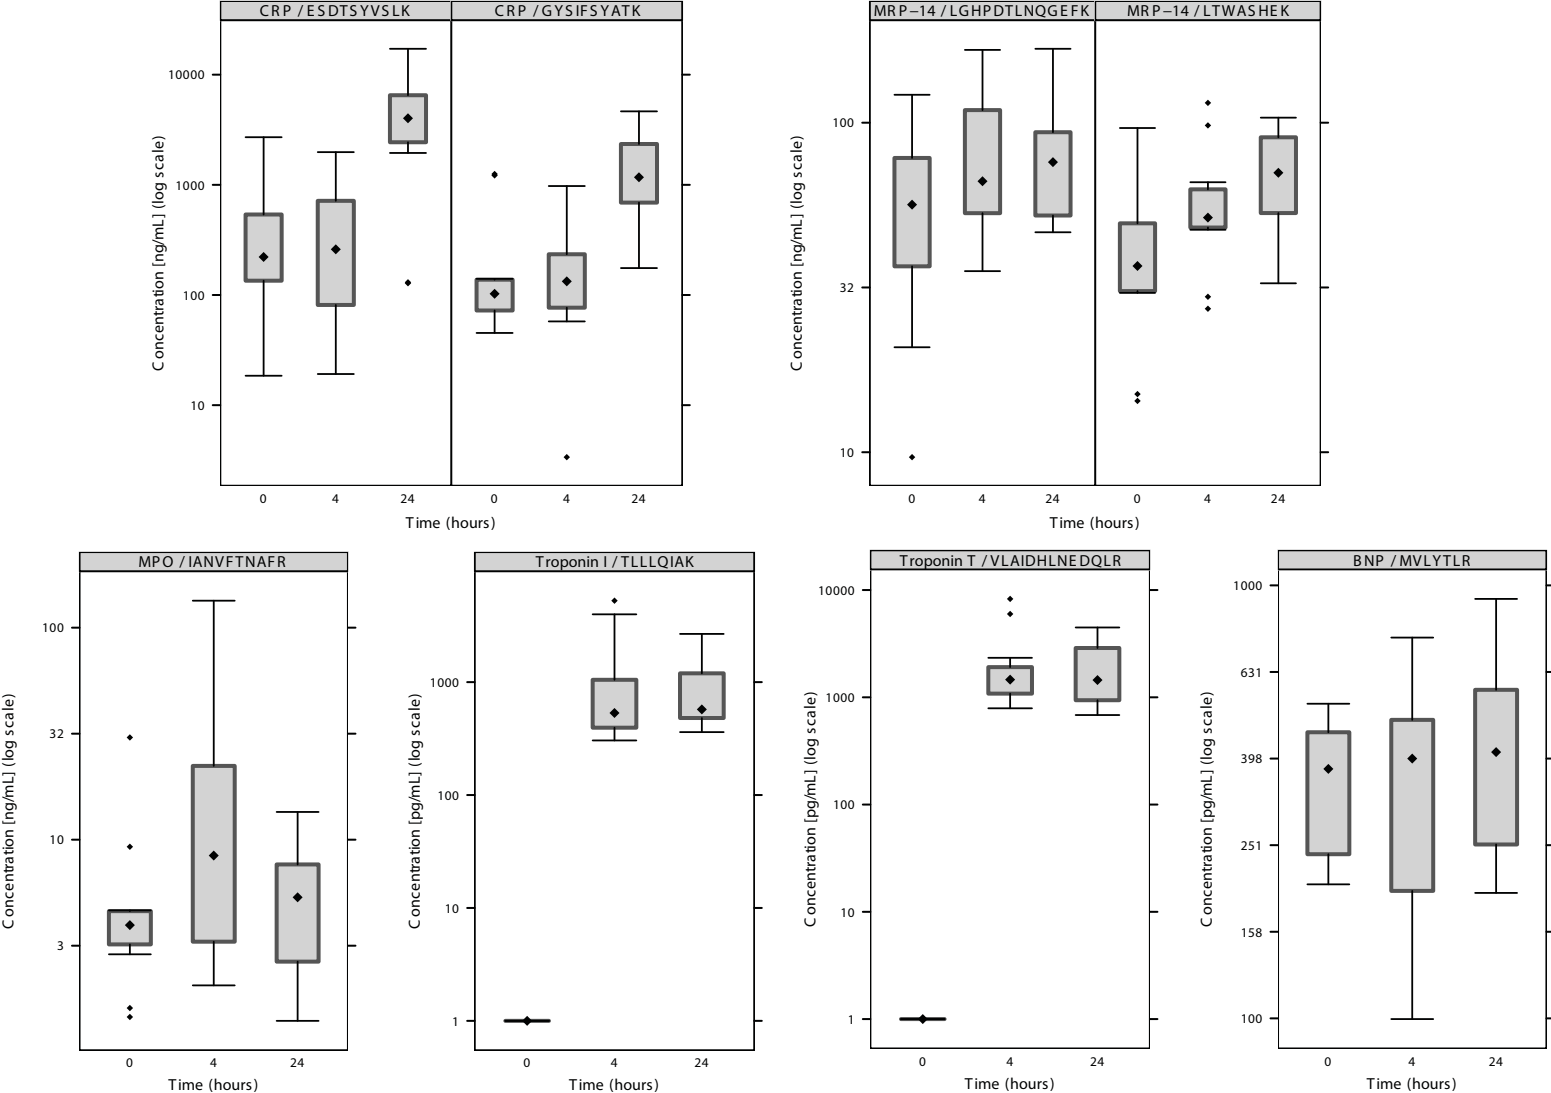

**Supplemental Figure 3: Quantitation of all 6 proteins across all the patient plasma samples.** Box and whisker plots showing median concentration and the range of concentrations measured by MRM assay at baseline, 4h and 24h for CRP (A), MRP 14 (B), MPO (C), cTnI (D), cTnT (E), and NT-proBNP (F).

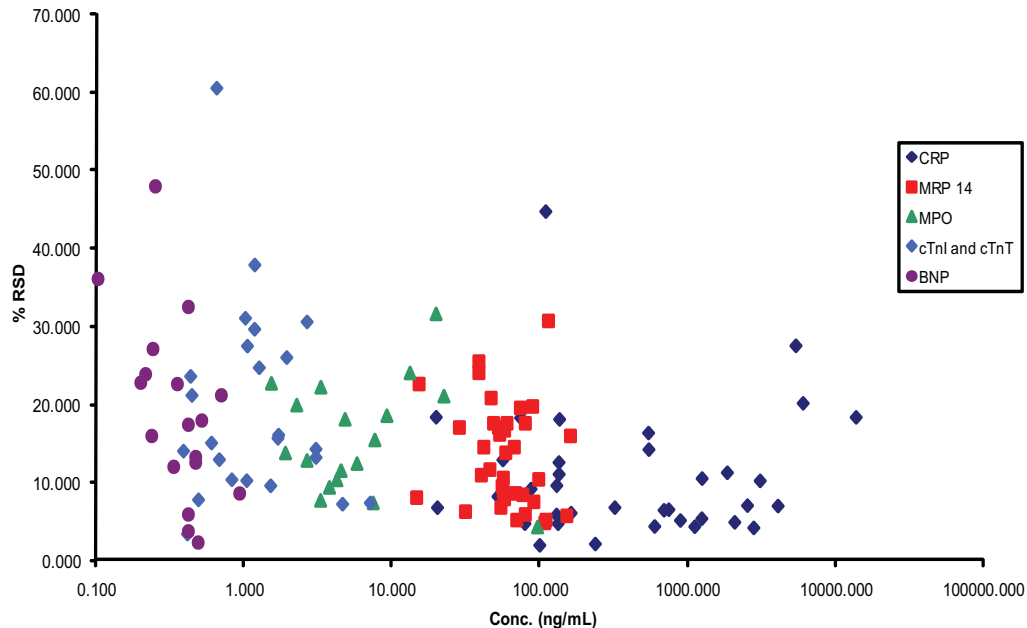

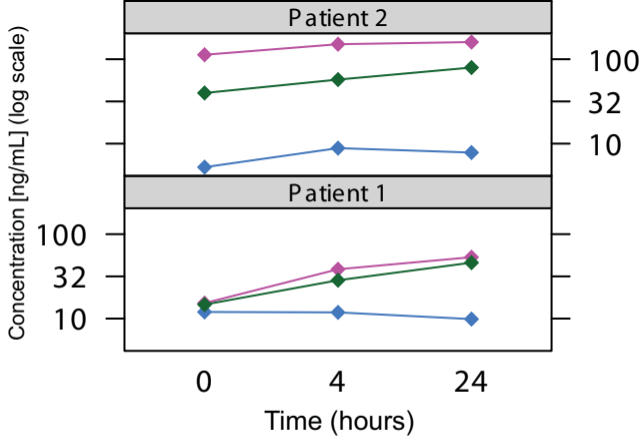

**Supplemental Figure 5: Comparison of MRM assay with the Immunoassay for MRP 14.** Line plots of Log<sub>10</sub> [concentration] of MRP 14 at the baseline, 4h, and 24h as measured by MRM with 2 different signature peptides (LGHPDTLNQGEFK in pink and LTWASHEK in green) and by immunoassay (blue) for 2 patients.

**Supplemental Table 1. Target proteins and their signature peptides.** Both [<sup>12</sup>C] and [<sup>13</sup>C] versions of signature peptides were synthesized. Uniformly labeled amino acids and transitions used for quantification are indicated in boldface type.

| Protein    | MW (kDa) | Signature Peptide                                                            | MH+ (mono) | Z (Q1) | MRM Transitions <sup>b</sup> |       |              |              |
|------------|----------|------------------------------------------------------------------------------|------------|--------|------------------------------|-------|--------------|--------------|
|            |          |                                                                              |            |        | Q1                           | Q3    |              |              |
| NT-proBNP  | 11       | EVATEGIR                                                                     | 874.5      | 2      | 437.7                        | 474.3 | 575.3        | <b>646.4</b> |
|            |          | EVATEG[ <sup>13</sup> C <sub>6</sub> ]IR                                     | 880.5      | 2      | 440.8                        | 480.3 | 581.3        | <b>652.4</b> |
|            |          | MVLYTLR                                                                      | 895.5      | 2      | 448.3                        | 552.3 | <b>665.4</b> | 764.5        |
|            |          | MVLYT[ <sup>13</sup> C <sub>6</sub> ]LR                                      | 901.5      | 2      | 451.3                        | 558.3 | <b>671.4</b> | 770.5        |
|            |          | MoxVLYTLR                                                                    | 911.5      | 2      | 456.3                        | 552.3 | <b>665.4</b> | 764.5        |
|            |          | MoxVLYT[ <sup>13</sup> C <sub>6</sub> ]LR                                    | 917.5      | 2      | 459.3                        | 558.3 | <b>671.4</b> | 770.5        |
| MRP14      | 13       | LTWASHEK                                                                     | 971.5      | 2      | 486.3                        | 500.3 | 571.3        | <b>757.4</b> |
|            |          | [ <sup>13</sup> C <sub>6</sub> ]LTWASHEK                                     | 977.5      | 2      | 489.3                        | 500.3 | 571.3        | <b>757.4</b> |
|            |          | LGHPDTLNQGEFK                                                                | 1455.7     | 3      | 485.9                        | 621.3 | <b>722.4</b> | 734.4        |
|            |          | LGHPDT[ <sup>13</sup> C <sub>6</sub> ]LNQGEFK                                | 1461.7     | 3      | 487.9                        | 621.3 | <b>722.4</b> | 740.4        |
| BNP 32     | 15       | ISSSSGLGC <sub>amc</sub> K <sup>a</sup>                                      | 995.5      | 2      | 498.2                        | 708.3 | <b>795.4</b> | 882.4        |
|            |          | ISSSSG[ <sup>13</sup> C <sub>6</sub> ]LGC <sub>amc</sub> K <sup>a</sup>      | 1001.5     | 2      | 501.3                        | 714.4 | <b>801.4</b> | 888.4        |
|            |          | MVQGS GC <sub>amc</sub> FGR <sup>a</sup>                                     | 1098.5     | 2      | 549.7                        | 683.3 | 740.3        | <b>868.4</b> |
|            |          | M[ <sup>13</sup> C <sub>5</sub> ]VQGS GC <sub>amc</sub> FGR <sup>a</sup>     | 1103.5     | 2      | 552.3                        | 683.3 | 740.3        | <b>868.4</b> |
|            |          | MoxVQGS GC <sub>amc</sub> FGR <sup>a</sup>                                   | 1114.5     | 2      | 557.7                        | 683.3 | 740.3        | <b>868.4</b> |
|            |          | Mox [ <sup>13</sup> C <sub>5</sub> ] VQGS GC <sub>amc</sub> FGR <sup>a</sup> | 1119.5     | 2      | 560.3                        | 683.3 | 740.3        | <b>868.4</b> |
| Troponin I | 24       | TLLLQIAK                                                                     | 899.6      | 2      | 450.3                        | 459.3 | 572.4        | <b>685.5</b> |
|            |          | TLL[ <sup>13</sup> C <sub>6</sub> ]LQIAK                                     | 905.6      | 2      | 453.3                        | 459.3 | 578.4        | <b>691.5</b> |
|            |          | NITEIADLTQK                                                                  | 1245.7     | 2      | 623.3                        | 675.4 | <b>788.5</b> | 1018.5       |
|            |          | NITEIAD[ <sup>13</sup> C <sub>6</sub> ]LTQK                                  | 1251.7     | 2      | 626.4                        | 681.4 | <b>794.5</b> | 1024.6       |
|            |          | NIDALSGMEGR                                                                  | 1162.6     | 2      | 581.8                        | 636.3 | 749.4        | <b>935.4</b> |
|            |          | NIDA[ <sup>13</sup> C <sub>6</sub> ]LSGMEGR                                  | 1168.6     | 2      | 584.8                        | 636.3 | 755.4        | <b>941.5</b> |
| CRP        | 25       | ESDTSYVSLK                                                                   | 1128.5     | 2      | 564.8                        | 609.4 | <b>696.4</b> | 797.4        |
|            |          | ESDTSYVS[ <sup>13</sup> C <sub>6</sub> ]LK                                   | 1134.6     | 2      | 567.8                        | 615.4 | <b>702.4</b> | 803.5        |
|            |          | GYSIFSYATK                                                                   | 1136.6     | 2      | 568.8                        | 716.4 | 829.5        | <b>916.5</b> |
|            |          | GYS[ <sup>13</sup> C <sub>6</sub> ]IFS YATK                                  | 1142.6     | 2      | 517.8                        | 716.4 | 835.5        | <b>922.5</b> |
| sCD40L     | 29       | TTSVLQWAEK                                                                   | 1162.6     | 2      | 581.8                        | 661.3 | 774.4        | <b>960.5</b> |
|            |          | TTSV[ <sup>13</sup> C <sub>6</sub> ]LQWAEK                                   | 1168.6     | 2      | 584.8                        | 661.3 | 780.4        | <b>966.5</b> |

|            |    |                                                                              |        |   |       |              |               |               |
|------------|----|------------------------------------------------------------------------------|--------|---|-------|--------------|---------------|---------------|
|            |    | EASSQAPFIASLC <sub>amc</sub> LK <sup>a</sup>                                 | 1621.8 | 2 | 811.4 | 691.4        | <b>1048.6</b> | 1119.6        |
|            |    | EASSQAPFIASLC <sub>amc</sub> [ <sup>13</sup> C <sub>6</sub> ]LK <sup>a</sup> | 1627.8 | 2 | 814.4 | 697.4        | <b>1054.6</b> | 1125.6        |
|            |    | SQFEGFVK                                                                     | 941.5  | 2 | 471.2 | 579.3        | <b>726.4</b>  | 837.4         |
|            |    | SQFEGF [ <sup>13</sup> C <sub>5</sub> ]VK                                    | 946.5  | 2 | 473.8 | 584.3        | <b>731.4</b>  | 842.4         |
|            |    | SLSLLNCEEIK                                                                  | 1305.7 | 2 | 653.3 | 792.4        | 905.4         | <b>1105.6</b> |
|            |    | SLSLLNCEE [ <sup>13</sup> C <sub>6</sub> ]IK                                 | 1311.7 | 2 | 656.4 | 798.4        | 911.5         | <b>1111.6</b> |
| IL 33      | 31 | DNHLALIK                                                                     | 923.5  | 2 | 462.3 | 480.2        | <b>551.3</b>  | 664.3         |
|            |    | DNHLA [ <sup>13</sup> C <sub>6</sub> ]LIK                                    | 929.6  | 2 | 465.3 | 480.2        | <b>551.3</b>  | 670.4         |
|            |    | TDPGVFIGVK                                                                   | 1032.6 | 2 | 516.8 | 662.4        | 719.5         | <b>816.5</b>  |
|            |    | TDPGVFIG [ <sup>13</sup> C <sub>5</sub> ]VK                                  | 1037.6 | 2 | 519.3 | 667.4        | 724.5         | <b>821.5</b>  |
|            |    | DFWLHANNK                                                                    | 1144.6 | 3 | 382.2 | 441.7        | <b>583.3</b>  | 696.4         |
|            |    | DFW [ <sup>13</sup> C <sub>6</sub> ]LHANNK                                   | 1150.6 | 3 | 384.2 | 444.7        | <b>583.3</b>  | 702.4         |
|            |    | VLLSYYESQHPSNESGDGVDGK                                                       | 2381.1 | 3 | 794.4 | 903.4        | 1028.4        | <b>1085.0</b> |
|            |    | VLLSYYESQHPSNESGDG [ <sup>13</sup> C <sub>5</sub> ]VDGK                      | 2386.1 | 3 | 796.0 | 905.9        | 1030.9        | <b>1087.5</b> |
| Troponin T | 34 | VLAIDHLNEDQLR                                                                | 1535.8 | 3 | 512.6 | <b>662.3</b> | 718.9         | 774.4         |
|            |    | VLAIDHLNEDQ [ <sup>13</sup> C <sub>6</sub> ]LR                               | 1541.8 | 3 | 514.6 | <b>665.4</b> | 721.9         | 780.4         |
|            |    | SFMPNLVPPK                                                                   | 1129.6 | 2 | 565.3 | <b>764.5</b> | 789.4         | 895.5         |
|            |    | SFMPNL [ <sup>13</sup> C <sub>5</sub> ]VPPK                                  | 1134.6 | 2 | 567.8 | <b>769.5</b> | 794.4         | 900.5         |
|            |    | SFMoxPNLVPPK                                                                 | 1145.6 | 2 | 573.3 | <b>764.5</b> | 805.4         | 911.5         |
|            |    | SFMoxPNL [ <sup>13</sup> C <sub>5</sub> ]VPPK                                | 1150.6 | 2 | 575.8 | <b>769.5</b> | 810.4         | 916.5         |
|            |    | YEINVLR                                                                      | 906.5  | 2 | 453.8 | 501.3        | <b>614.4</b>  | 743.4         |
|            |    | YEINV [ <sup>13</sup> C <sub>6</sub> ]LR                                     | 912.5  | 2 | 456.8 | 507.3        | <b>620.4</b>  | 749.5         |
| MPO        | 84 | IPC <sub>amc</sub> FLAGDTR <sup>a</sup>                                      | 1149.6 | 2 | 575.3 | 632.3        | <b>779.4</b>  | 939.4         |
|            |    | IPC <sub>amc</sub> F [ <sup>13</sup> C <sub>6</sub> ]LAGDTR <sup>a</sup>     | 1155.6 | 2 | 578.3 | 638.4        | <b>785.4</b>  | 945.5         |
|            |    | IANVFTNAFR                                                                   | 1152.6 | 2 | 576.8 | <b>755.4</b> | 854.5         | 968.5         |
|            |    | IAN [ <sup>13</sup> C <sub>5</sub> ]VFTNAFR                                  | 1157.6 | 2 | 579.3 | <b>755.4</b> | 859.5         | 973.5         |

<sup>a</sup> Cysteines synthesized as carbamidomethyl cysteines

<sup>b</sup> All three transitions per peptide were monitored. However, LOD and LOQ values reported in table 1 as well as transition used for the quantification of peptides in patient plasma is the transition in boldface type.

**Supplemental Table 2. Summary of MRM measurements for all patients and timepoints.**

| Sample    | C reactive protein   |                               |                      |                    |                               |                      |                               |                      |                    |                               | Myeloid related protein 14 |                               |                      |                    |                               |                      |                               |                      |                    |                               |      |
|-----------|----------------------|-------------------------------|----------------------|--------------------|-------------------------------|----------------------|-------------------------------|----------------------|--------------------|-------------------------------|----------------------------|-------------------------------|----------------------|--------------------|-------------------------------|----------------------|-------------------------------|----------------------|--------------------|-------------------------------|------|
|           | ESDTSYVSLK           |                               |                      |                    |                               | GYSIFSYATK           |                               |                      |                    |                               | LTWASHEK                   |                               |                      |                    |                               | LGHPDTLNQGEFK        |                               |                      |                    |                               |      |
|           | Technical replicates |                               | Process replicates   |                    |                               | Technical replicates |                               | Process replicates   |                    |                               | Technical replicates       |                               | Process replicates   |                    |                               | Technical replicates |                               | Process replicates   |                    |                               |      |
|           | Avg. Conc. (ng/mL)   | Intra-assay % CV <sup>a</sup> | Avg S/N <sup>b</sup> | Avg. Conc. (ng/mL) | Inter-assay % CV <sup>c</sup> | Avg. Conc. (ng/mL)   | Intra-assay % CV <sup>a</sup> | Avg S/N <sup>b</sup> | Avg. Conc. (ng/mL) | Inter-assay % CV <sup>c</sup> | Avg. Conc. (ng/mL)         | Intra-assay % CV <sup>a</sup> | Avg S/N <sup>b</sup> | Avg. Conc. (ng/mL) | Inter-assay % CV <sup>c</sup> | Avg. Conc. (ng/mL)   | Intra-assay % CV <sup>a</sup> | Avg S/N <sup>b</sup> | Avg. Conc. (ng/mL) | Inter-assay % CV <sup>c</sup> |      |
| Patient 1 | rep 1 Baseline       | 163.48                        | 1.3                  | 395                | 161.44                        | 4.1                  | 58.09                         | 3.5                  | 475                | 51.66                         | 5.6                        | 15.01                         | 7.8                  | 24                 | 14.66                         | 32.9                 | 20.82                         | 16.4                 | 52                 | 15.24                         | 42.6 |
|           | rep 1 4 hr           | 61.69                         | 1.5                  | 543                | 99.13                         | 41.4                 | 3.37                          | 2.6                  | 43                 | 55.84                         | 87.1                       | 29.63                         | 7.7                  | 249                | 28.44                         | 10.4                 | 41.33                         | 17.0                 | 190                | 38.39                         | 17.0 |
|           | rep 1 24 hr          | 1946.77                       | 4.7                  | 11153              | 2774.73                       | 32.8                 | 175.54                        | 1.9                  | 1810               | 1107.26                       | 78.9                       | 59.37                         | 8.9                  | 96                 | 45.96                         | 31.2                 | 57.80                         | 9.3                  | 257                | 53.36                         | 13.7 |
|           | rep 2 Baseline       | 159.40                        | 5.9                  | 332                |                               |                      | 45.23                         | 8.1                  | 215                |                               |                            | 14.31                         | 0.2                  | 25                 |                               |                      | 9.66                          | 4.7                  | 50                 |                               |      |
|           | rep 2 4 hr           | 136.57                        | 1.2                  | 334                |                               |                      | 108.31                        | 6.6                  | 226                |                               |                            | 27.25                         | 15.6                 | 53                 |                               |                      | 35.45                         | 16.9                 | 269                |                               |      |
|           | rep 2 24 hr          | 3602.68                       | 1.9                  | 5206               |                               |                      | 2038.98                       | 2.3                  | 13156              |                               |                            | 32.56                         | 2.2                  | 303                |                               |                      | 48.92                         | 13.6                 | 498                |                               |      |
| Patient 2 | rep 1 Baseline       | 574.43                        | 12.9                 | 551                | 539.14                        | 12.6                 | 135.33                        | 9.5                  | 59                 | 133.85                        | 3.6                        | 48.43                         | 7.4                  | 70                 | 39.83                         | 24.7                 | 121.56                        | 15.0                 | 97                 | 112.92                        | 30.8 |
|           | rep 1 4 hr           | 429.98                        | 12.5                 | 421                | 542.21                        | 24.2                 | 120.18                        | 12.4                 | 60                 | 133.67                        | 13.5                       | 65.97                         | 12.8                 | 118                | 57.40                         | 19.5                 | 166.33                        | 3.7                  | 201                | 150.55                        | 12.1 |
|           | rep 1 24 hr          | 4483.56                       | 13.2                 | 2936               | 5346.39                       | 24.8                 | 499.11                        | 1.9                  | 585                | 593.32                        | 17.7                       | 71.09                         | 6.5                  | 343                | 79.70                         | 26.5                 | 167.61                        | 13.9                 | 83                 | 159.64                        | 12.3 |
|           | rep 2 Baseline       | 503.85                        | 9.3                  | 368                |                               |                      | 132.37                        | 5.3                  | 125                |                               |                            | 31.22                         | 7.9                  | 13                 |                               |                      | 104.29                        | 28.2                 | 72                 |                               |      |
|           | rep 2 4 hr           | 654.43                        | 8.3                  | 376                |                               |                      | 147.17                        | 5.0                  | 102                |                               |                            | 48.82                         | 9.2                  | 36                 |                               |                      | 134.77                        | 4.4                  | 132                |                               |      |
|           | rep 2 24 hr          | 6209.22                       | 21.6                 | 3461               |                               |                      | 687.53                        | 3.4                  | 1231               |                               |                            | 88.30                         | 14.9                 | 465                |                               |                      | 151.67                        | 6.7                  | 124                |                               |      |
| Patient 3 | rep 1 Baseline       | 132.16                        | 16.7                 | 100                | 134.87                        | 10.0                 | 62.72                         | 6.8                  | 33                 | 73.50                         | 18.0                       | 61.29                         | 8.2                  | 130                | 55.95                         | 11.9                 | 73.15                         | 16.4                 | 201                | 73.68                         | 11.3 |
|           | rep 1 4 hr           | 106.90                        | 4.8                  | 343                | 131.93                        | 21.2                 | 57.56                         | 7.8                  | 273                | 108.85                        | 45.8                       | 50.28                         | 14.0                 | 88                 | 48.81                         | 10.1                 | 63.12                         | 12.3                 | 327                | 58.86                         | 3.8  |
|           | rep 1 24 hr          | 3085.78                       | 0.4                  | 7736               | 3065.50                       | 6.4                  | 962.68                        | 9.2                  | 1275               | 1240.67                       | 27.3                       | 45.24                         | 15.4                 | 35                 | 46.44                         | 13.5                 | 51.96                         | 10.9                 | 307                | 52.28                         | 10.7 |
|           | rep 2 Baseline       | 137.59                        | 7.4                  | 74                 |                               |                      | 84.28                         | 15.1                 | 92                 |                               |                            | 50.61                         | 8.2                  | 60                 |                               |                      | 74.22                         | 10.6                 | 273                |                               |      |
|           | rep 2 4 hr           | 156.96                        | 2.1                  | 456                |                               |                      | 160.14                        | 30.2                 | 94                 |                               |                            | 47.33                         | 10.2                 | 147                |                               |                      | 54.60                         | 4.0                  | 356                |                               |      |
|           | rep 2 24 hr          | 3045.21                       | 10.2                 | 6521               |                               |                      | 1518.66                       | 6.2                  | 1859               |                               |                            | 47.65                         | 14.0                 | 83                 |                               |                      | 52.60                         | 12.9                 | 318                |                               |      |
| Patient 4 | rep 1 Baseline       | 18.49                         | 7.6                  | 15                 | 19.76                         | 9.8                  | 83.42                         | 7.6                  | 98                 | 86.53                         | 7.3                        | 41.54                         | 6.1                  | 50                 | 68.95                         | 43.7                 | 36.04                         | 4.8                  | 276                | 59.18                         | 44.2 |
|           | rep 1 4 hr           | 19.17                         | 5.7                  | 24                 | 20.17                         | 6.5                  | 96.01                         | 2.9                  | 96                 | 78.64                         | 24.1                       | 98.13                         | 0.4                  | 532                | 106.50                        | 9.1                  | 95.56                         | 4.8                  | 816                | 110.19                        | 15.5 |
|           | rep 1 24 hr          | 127.96                        | 3.9                  | 263                | 129.14                        | 5.6                  | 691.57                        | 3.4                  | 211                | 739.44                        | 10.1                       | 103.60                        | 9.0                  | 77                 | 97.98                         | 9.1                  | 46.51                         | 4.9                  | 93                 | 66.40                         | 34.8 |
|           | rep 2 Baseline       | 21.03                         | 15.8                 | 17                 |                               |                      | 89.64                         | 5.2                  | 83                 |                               |                            | 96.36                         | 2.5                  | 248                |                               |                      | 82.31                         | 12.4                 | 631                |                               |      |
|           | rep 2 4 hr           | 21.17                         | 3.8                  | 123                |                               |                      | 61.27                         | 3.9                  | 224                |                               |                            | 114.87                        | 4.4                  | 613                |                               |                      | 124.82                        | 2.5                  | 709                |                               |      |
|           | rep 2 24 hr          | 130.33                        | 8.6                  | 296                |                               |                      | 787.30                        | 5.2                  | 941                |                               |                            | 92.36                         | 4.4                  | 109                |                               |                      | 86.29                         | 10.9                 | 309                |                               |      |
| Patient 5 | rep 1 Baseline       | 338.33                        | 3.1                  | 928                | 319.09                        | 7.8                  | 140.19                        | 1.0                  | 317                | 128.75                        | 10.3                       | 43.95                         | 15.7                 | 222                | 38.23                         | 19.5                 | 46.10                         | 9.7                  | 57                 | 41.69                         | 14.7 |
|           | rep 1 4 hr           | 589.47                        | 1.9                  | 948                | 686.02                        | 16.3                 | 212.01                        | 1.6                  | 577                | 235.44                        | 11.0                       | 52.82                         | 2.2                  | 268                | 55.65                         | 8.2                  | 51.73                         | 7.5                  | 296                | 57.62                         | 12.6 |
|           | rep 1 24 hr          | 6816.15                       | 17.4                 | 7058               | 5980.60                       | 19.9                 | 2701.60                       | 3.2                  | 6547               | 2063.22                       | 34.0                       | 69.89                         | 3.7                  | 431                | 67.79                         | 6.7                  | 86.07                         | 1.5                  | 323                | 79.42                         | 9.9  |
|           | rep 2 Baseline       | 299.85                        | 6.2                  | 800                |                               |                      | 117.31                        | 6.2                  | 261                |                               |                            | 32.50                         | 15.7                 | 54                 |                               |                      | 37.27                         | 10.8                 | 276                |                               |      |
|           | rep 2 4 hr           | 782.57                        | 5.4                  | 1608               |                               |                      | 258.87                        | 1.3                  | 468                |                               |                            | 58.48                         | 8.8                  | 147                |                               |                      | 63.51                         | 3.7                  | 298                |                               |      |
|           | rep 2 24 hr          | 5145.05                       | 3.3                  | 11938              |                               |                      | 1424.85                       | 3.5                  | 7116               |                               |                            | 65.69                         | 8.0                  | 384                |                               |                      | 72.76                         | 6.2                  | 760                |                               |      |
| Patient 6 | rep 1 Baseline       | 2705.32                       | 5.6                  | 881                | 2514.99                       | 9.4                  | 1253.28                       | 2.8                  | 1453               | 1235.80                       | 3.5                        | 30.45                         | 3.9                  | 115                | 31.01                         | 4.4                  | 51.85                         | 5.3                  | 143                | 56.61                         | 8.1  |
|           | rep 1 4 hr           | 1980.51                       | 9.4                  | 980                | 1837.44                       | 11.2                 | 975.07                        | 2.9                  | 1623               | 885.36                        | 11.4                       | 59.73                         | 5.2                  | 179                | 54.67                         | 11.0                 | 82.69                         | 6.5                  | 121                | 76.09                         | 10.9 |
|           | rep 1 24 hr          | 10140.82                      | 10.7                 | 9282               | 13656.18                      | 30.5                 | 3453.21                       | 7.0                  | 5670               | 4048.91                       | 16.7                       | 81.17                         | 4.8                  | 232                | 88.86                         | 14.1                 | 79.22                         | 5.8                  | 149                | 90.34                         | 14.3 |
|           | rep 2 Baseline       | 2324.66                       | 3.7                  | 4166               |                               |                      | 1218.32                       | 4.5                  | 2532               |                               |                            | 31.56                         | 4.9                  | 161                |                               |                      | 61.37                         | 6.6                  | 340                |                               |      |
|           | rep 2 4 hr           | 1694.37                       | 5.2                  | 4050               |                               |                      | 795.64                        | 4.4                  | 2573               |                               |                            | 49.61                         | 3.9                  | 203                |                               |                      | 69.49                         | 4.8                  | 348                |                               |      |
|           | rep 2 24 hr          | 17171.53                      | 13.1                 | 3544               |                               |                      | 4644.61                       | 3.0                  | 13024              |                               |                            | 96.55                         | 17.7                 | 364                |                               |                      | 101.46                        | 4.9                  | 149                |                               |      |



Supplemental Table 2 cont.

| Sample    | Myeloperoxidase      |                               |                      |                    |                               | Troponin I           |                               |                      |                    |                               | Troponin T           |                               |                      |                    |                               | NT-proBNP            |                               |                      |                    |                               |      |
|-----------|----------------------|-------------------------------|----------------------|--------------------|-------------------------------|----------------------|-------------------------------|----------------------|--------------------|-------------------------------|----------------------|-------------------------------|----------------------|--------------------|-------------------------------|----------------------|-------------------------------|----------------------|--------------------|-------------------------------|------|
|           | IANVFTNAFR           |                               |                      |                    |                               | TLLLQIAK             |                               |                      |                    |                               | VLAIHNLNEDQLR        |                               |                      |                    |                               | MVLTYTLR             |                               |                      |                    |                               |      |
|           | Technical replicates |                               | Process replicates   |                    |                               | Technical replicates |                               | Process replicates   |                    |                               | Technical replicates |                               | Process replicates   |                    |                               | Technical replicates |                               | Process replicates   |                    |                               |      |
|           | Avg. Conc. (ng/mL)   | Intra-assay % CV <sup>a</sup> | Avg S/N <sup>b</sup> | Avg. Conc. (ng/mL) | Inter-assay % CV <sup>c</sup> | Avg. Conc. (ng/mL)   | Intra-assay % CV <sup>a</sup> | Avg S/N <sup>b</sup> | Avg. Conc. (ng/mL) | Inter-assay % CV <sup>c</sup> | Avg. Conc. (ng/mL)   | Intra-assay % CV <sup>a</sup> | Avg S/N <sup>b</sup> | Avg. Conc. (ng/mL) | Inter-assay % CV <sup>c</sup> | Avg. Conc. (ng/mL)   | Intra-assay % CV <sup>a</sup> | Avg S/N <sup>b</sup> | Avg. Conc. (ng/mL) | Inter-assay % CV <sup>c</sup> |      |
| Patient 1 | rep 1 Baseline       | 3.92                          | 5.0                  | 37                 | 4.24                          | 10.5                 | n/d <sup>d</sup>              | -                    | -                  | -                             | n/d <sup>d</sup>     | -                             | -                    | -                  | 0.44                          | 3.6                  | 141                           | 0.42                 | 6.9                |                               |      |
|           | rep 1 4 hr           | 20.33                         | 14.3                 | 8                  | 22.38                         | 17.9                 | 3.98                          | 7.9                  | 40                 | 4.62                          | 15.8                 | 8.27                          | 5.2                  | 189                | 7.12                          | 17.6                 | 0.76                          | 16.3                 | 36                 | 0.70                          | 15.9 |
|           | rep 1 24 hr          | 9.39                          | 5.6                  | 4                  | 7.46                          | 28.8                 | 0.54                          | 6.5                  | 19                 | 0.49                          | 11.4                 | 0.68                          | 11.9                 | 10                 | 0.82                          | 20.6                 | 0.93                          | 4.5                  | 15                 | 0.93                          | 5.4  |
|           | rep 2 Baseline       | 4.56                          | 8.5                  | 53                 |                               |                      | n/d                           | -                    | -                  | -                             | n/d                  | -                             | -                    | -                  | 0.40                          | 4.6                  | 96                            |                      |                    |                               |      |
|           | rep 2 4 hr           | 24.43                         | 15.2                 | 25                 |                               |                      | 5.26                          | 1.8                  | 32                 |                               |                      | 5.98                          | 4.7                  | 10                 | 0.65                          | 12.9                 | 7                             |                      |                    |                               |      |
|           | rep 2 24 hr          | 5.52                          | 2.3                  | 69                 |                               |                      | 0.44                          | 3.1                  | 17                 |                               |                      | 0.96                          | 2.2                  | 23                 | 0.93                          | 7.2                  | 170                           |                      |                    |                               |      |
| Patient 2 | rep 1 Baseline       | 30.35                         | 17.8                 | 9                  | 19.81                         | 68.2                 | n/d <sup>d</sup>              | -                    | -                  | -                             | n/d <sup>d</sup>     | -                             | -                    | -                  | 0.50                          | 2.6                  | 19                            | 0.42                 | 20.6               |                               |      |
|           | rep 1 4 hr           | 134.05                        | 3.0                  | 59                 | 95.80                         | 40.6                 | 0.55                          | 31.5                 | 2                  | 0.65                          | 42.1                 | 1.57                          | 24.0                 | 5                  | 1.18                          | 43.3                 | 0.47                          | 2.1                  | 24                 | 0.49                          | 5.1  |
|           | rep 1 24 hr          | 13.52                         | 18.2                 | 11                 | 13.22                         | 15.4                 | 2.67                          | 14.9                 | 9                  | 2.66                          | 19.3                 | 0.92                          | 8.6                  | 2                  | 1.94                          | 60.0                 | 0.44                          | 15.7                 | 18                 | 0.52                          | 19.9 |
|           | rep 2 Baseline       | 9.26                          | 33.9                 | 6                  |                               |                      | n/d                           | -                    | -                  | -                             | n/d                  | -                             | -                    | -                  | 0.34                          | 2.5                  | 20                            |                      |                    |                               |      |
|           | rep 2 4 hr           | 57.56                         | 1.0                  | 33                 |                               |                      | 0.76                          | 46.9                 | 3                  |                               |                      | 0.79                          | 30.0                 | 3                  | 0.51                          | 1.0                  | 24                            |                      |                    |                               |      |
|           | rep 2 24 hr          | 12.93                         | 15.4                 | 10                 |                               |                      | 2.65                          | 26.7                 | 11                 |                               |                      | 2.96                          | 16.8                 | 10                 | 0.60                          | 10.4                 | 22                            |                      |                    |                               |      |
| Patient 3 | rep 1 Baseline       | 3.57                          | 9.3                  | 29                 | 3.78                          | 8.4                  | n/d <sup>d</sup>              | -                    | -                  | -                             | n/d <sup>d</sup>     | -                             | -                    | -                  | 0.53                          | 8.1                  | 107                           | 0.47                 | 16.6               |                               |      |
|           | rep 1 4 hr           | 8.18                          | 17.6                 | 28                 | 9.23                          | 17.1                 | 1.00                          | 13.4                 | 12                 | 1.05                          | 17.9                 | 1.44                          | 16.5                 | 15                 | 1.26                          | 19.3                 | 0.41                          | 12.0                 | 72                 | 0.41                          | 8.9  |
|           | rep 1 24 hr          | 6.22                          | 3.9                  | 8                  | 5.80                          | 11.1                 | 0.42                          | 5.8                  | 4                  | 1.17                          | 73.7                 | 2.81                          | 12.8                 | 17                 | 3.06                          | 8.0                  | 0.55                          | 7.0                  | 105                | 0.47                          | 20.1 |
|           | rep 2 Baseline       | 3.99                          | 2.8                  | 27                 |                               |                      | n/d                           | -                    | -                  | -                             | n/d                  | -                             | -                    | -                  | 0.41                          | 11.1                 | 87                            |                      |                    |                               |      |
|           | rep 2 4 hr           | 10.27                         | 8.9                  | 21                 |                               |                      | 1.09                          | 23.2                 | 6                  |                               |                      | 1.09                          | 18.4                 | 8                  | 0.42                          | 12.0                 | 100                           |                      |                    |                               |      |
|           | rep 2 24 hr          | 5.38                          | 12.5                 | 16                 |                               |                      | 1.93                          | 17.9                 | 10                 |                               |                      | 3.30                          | 5.3                  | 38                 | 0.39                          | 11.5                 | 77                            |                      |                    |                               |      |
| Patient 4 | rep 1 Baseline       | 4.64                          | 4.8                  | 9                  | 4.53                          | 7.8                  | n/d <sup>d</sup>              | -                    | -                  | -                             | n/d <sup>d</sup>     | -                             | -                    | -                  | 0.25                          | 6.3                  | 8                             | 0.24                 | 12.3               |                               |      |
|           | rep 1 4 hr           | 8.67                          | 12.3                 | 21                 | 7.65                          | 17.5                 | 0.52                          | 1.1                  | 4                  | 0.41                          | 28.7                 | 2.33                          | 9.2                  | 18                 | 1.71                          | 41.6                 | 0.23                          | 13.5                 | 6                  | 0.20                          | 22.0 |
|           | rep 1 24 hr          | 5.32                          | 7.0                  | 50                 | 4.82                          | 17.0                 | 0.67                          | 13.2                 | 7                  | 0.60                          | 15.6                 | 4.48                          | 9.3                  | 10                 | 3.05                          | 51.9                 | 0.25                          | 18.2                 | 23                 | 0.25                          | 32.7 |
|           | rep 2 Baseline       | 4.41                          | 10.6                 | 16                 |                               |                      | n/d                           | -                    | -                  | -                             | n/d                  | -                             | -                    | -                  | 0.22                          | 15.4                 | 9                             |                      |                    |                               |      |
|           | rep 2 4 hr           | 6.63                          | 7.5                  | 49                 |                               |                      | 0.30                          | 3.9                  | 8                  |                               |                      | 1.08                          | 15.5                 | 23                 | 0.17                          | 19.6                 | 8                             |                      |                    |                               |      |
|           | rep 2 24 hr          | 4.32                          | 18.2                 | 8                  |                               |                      | 0.53                          | 2.4                  | 6                  |                               |                      | 1.63                          | 7.3                  | 9                  | 0.25                          | 44.5                 | 3                             |                      |                    |                               |      |
| Patient 5 | rep 1 Baseline       | 1.61                          | 14.8                 | 15                 | 1.53                          | 15.2                 | n/d <sup>d</sup>              | -                    | -                  | -                             | n/d <sup>d</sup>     | -                             | -                    | -                  | 0.47                          | 26.4                 | 46                            | 0.42                 | 23.9               |                               |      |
|           | rep 1 4 hr           | 2.05                          | 12.5                 | 14                 | 2.27                          | 16.4                 | 0.39                          | 21.1                 | 11                 | 0.43                          | 19.0                 | 1.49                          | 8.5                  | 22                 | 1.51                          | 6.2                  | 0.32                          | 24.1                 | 26                 | 0.35                          | 18.3 |
|           | rep 1 24 hr          | 2.42                          | 8.5                  | 12                 | 1.91                          | 30.5                 | 0.74                          | 10.8                 | 16                 | 0.68                          | 13.2                 | 2.27                          | 11.4                 | 45                 | 1.69                          | 38.9                 | 0.43                          | 2.9                  | 41                 | 0.33                          | 34.4 |
|           | rep 2 Baseline       | 1.46                          | 17.4                 | 8                  |                               |                      | n/d                           | -                    | -                  | -                             | n/d                  | -                             | -                    | -                  | 0.36                          | 14.6                 | 28                            |                      |                    |                               |      |
|           | rep 2 4 hr           | 2.49                          | 14.9                 | 12                 |                               |                      | 0.48                          | 12.7                 | 14                 |                               |                      | 1.53                          | 4.4                  | 18                 | 0.39                          | 6.1                  | 34                            |                      |                    |                               |      |
|           | rep 2 24 hr          | 1.40                          | 11.5                 | 12                 |                               |                      | 0.61                          | 5.5                  | 33                 |                               |                      | 1.11                          | 3.6                  | 36                 | 0.23                          | 16.4                 | 18                            |                      |                    |                               |      |
| Patient 6 | rep 1 Baseline       | 3.71                          | 5.6                  | 13                 | 3.30                          | 14.6                 | n/d <sup>d</sup>              | -                    | -                  | -                             | n/d <sup>d</sup>     | -                             | -                    | -                  | 0.23                          | 20.8                 | 12                            | 0.22                 | 16.3               |                               |      |
|           | rep 1 4 hr           | 3.43                          | 14.5                 | 12                 | 3.31                          | 14.6                 | 0.40                          | 9.1                  | 8                  | 0.39                          | 9.5                  | 0.94                          | 22.5                 | 5                  | 1.02                          | 21.3                 | 0.10                          | 22.2                 | 6                  | 0.10                          | 23.1 |
|           | rep 1 24 hr          | 2.46                          | 7.4                  | 14                 | 2.67                          | 11.6                 | 0.36                          | 17.8                 | 6                  | 0.44                          | 24.1                 | 0.79                          | 5.5                  | 19                 | 1.04                          | 27.1                 | 0.19                          | 4.8                  | 12                 | 0.24                          | 26.6 |
|           | rep 2 Baseline       | 2.88                          | 5.0                  | 18                 |                               |                      | n/d                           | -                    | -                  | -                             | n/d                  | -                             | -                    | -                  | 0.20                          | 9.7                  | 28                            |                      |                    |                               |      |
|           | rep 2 4 hr           | 3.18                          | 16.9                 | 17                 |                               |                      | 0.37                          | 10.6                 | 12                 |                               |                      | 1.10                          | 21.3                 | 7                  | 0.11                          | 28.1                 | 8                             |                      |                    |                               |      |
|           | rep 2 24 hr          | 2.87                          | 10.0                 | 29                 |                               |                      | 0.52                          | 12.8                 | 21                 |                               |                      | 1.29                          | 7.4                  | 20                 | 0.28                          | 22.7                 | 43                            |                      |                    |                               |      |

<sup>a</sup> Intra-assay % CV is calculated by the following equation: Stnd. Dev /Avg. Area ratio x 100

<sup>b</sup> s/n is calculated by dividing peak height at the apex by 150cps.

<sup>c</sup> Inter-assay % CV is calculated based on the average of all 3 technical replicates of both process replicates.

<sup>d</sup> n/d indicates no detection of analyte.

**Supplemental Table 3.** Percent recovery as determined by MRM and clinical immunoassay.

| Protein   | % Recovery after depletion |                             |
|-----------|----------------------------|-----------------------------|
|           | MRM <sup>a, c</sup>        | Immunoassay <sup>b, c</sup> |
| NT-proBNP | NM                         | 65                          |
| MRP-14    | NM                         | 33                          |
| BNP32     | NM                         | NM                          |
| cTnl      | 4                          | NM                          |
| CRP       | 84                         | 61                          |
| sCD40L    | NM                         | NM                          |
| IL-33     | 93                         | NM                          |
| cTnT      | 0.5                        | 16                          |
| MPO       | NM                         | 40                          |

<sup>a</sup> Based upon MRM measurements with std protein in normal plasma

<sup>b</sup> Based upon immunoassay measurements in patient plasma.

<sup>c</sup> % Recovery is calculated by the following equation:

$(\text{Measured protein conc. after depletion}) / (\text{Measured protein conc. before depletion}) \times 100$

NM indicates not measured

**Supplemental Table 4. Results of clinical immuoassays for CRP, cTnT, MPO, MRP14 and NT-proBNP for patients 1-3.**

| Sample    |       | CRP      |        |            | cTnT     |        |            | MPO      |       |            | MRP-14 <sup>a</sup> |      |            | NT-proBNP |      |            |
|-----------|-------|----------|--------|------------|----------|--------|------------|----------|-------|------------|---------------------|------|------------|-----------|------|------------|
|           |       | ng/mL    |        | % Recovery | ng/mL    |        | % Recovery | ng/mL    |       | % Recovery | ng/mL               |      | % Recovery | ng/mL     |      | % Recovery |
|           |       | Non Depl | Depl   |            | Non Depl | Depl   |            | Non Depl | Depl  |            | Non Depl            | Depl |            | Non Depl  | Depl |            |
| Patient 1 | 0 hr  | 470.0    | 320.0  | 68         | < 0.01   | < 0.01 | -          | 33.9     | 17.5  | 52         | 12.0                | 4.2  | 34.9       | 0.9       | 0.6  | 67.2       |
|           | 4 hr  | 480.0    | 250.0  | 52         | 12.58    | 2.09   | 17         | 89.4     | 48.8  | 55         | 11.8                | 5.7  | 47.8       | 1.1       | 0.7  | 63.3       |
|           | 24 hr | 16200.0  | 7080.0 | 44         | 4.94     | 0.85   | 17         | 63.9     | 25.7  | 40         | 9.9                 | 6.2  | 63.0       | 3.3       | 1.8  | 54.2       |
| Patient 2 | 0 hr  | 1100.0   | 810.0  | 74         | < 0.01   | < 0.01 | -          | 30.0     | 15.1  | 50         | 5.3                 | 9.3  | 177.2      | 0.9       | 0.6  | 68.0       |
|           | 4 hr  | 1140.0   | 800.0  | 70         | 5.68     | 0.55   | 10         | 148.2    | 113.3 | 76         | 8.8                 | 13.1 | 148.3      | 0.9       | 0.6  | 67.2       |
|           | 24 hr | 8420.0   | 6160.0 | 73         | 6.52     | < 0.01 | 0          | 42.2     | 20.0  | 47         | 7.8                 | 12.8 | 163.0      | 1.6       | 1.1  | 68.9       |
| Patient 3 | 0 hr  | 390.0    | 230.0  | 59         | < 0.01   | < 0.01 | -          | 59.7     | 18.1  | 30         | 4.8                 | 26.2 | 543.6      | 1.2       | 0.7  | 60.9       |
|           | 4 hr  | 460.0    | 380.0  | 83         | 1.04     | 0.19   | 18         | 87.7     | 34.7  | 40         | QNS <sup>b</sup>    | 14.7 | -          | 1.0       | 0.7  | 69.2       |
|           | 24 hr | 7470.0   | 5580.0 | 75         | 4.31     | 0.70   | 16         | 65.5     | 23.8  | 36         | QNS <sup>b</sup>    | 12.9 | -          | 1.1       | 0.7  | 66.1       |

<sup>a</sup> MRP-14 variability in Immunoassay measurement is presently unknown.

<sup>b</sup> QNS indicates quantity not sufficient.
